# Supplementary material for: Somatic Mutational Profile of High-Grade Serous Ovarian Carcinoma and Triple-Negative Breast Carcinoma in Young and Elderly Patients: Similarities and Divergences
Source: MDPI journal article supplement (doi:10.3390/cells10123586), 2021-12-20
Supplement: s1 [file s1]

## Supplementary Figures

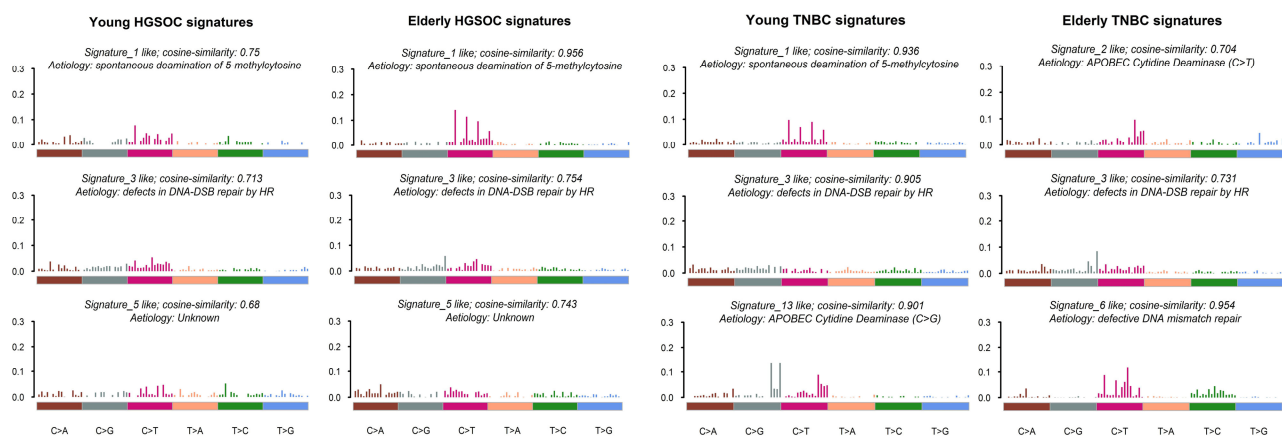

**Figure S1.** Mutational Signatures. For each signature, a barplot of the frequency distribution of single base substitutions in the trinucleotide context is shown.

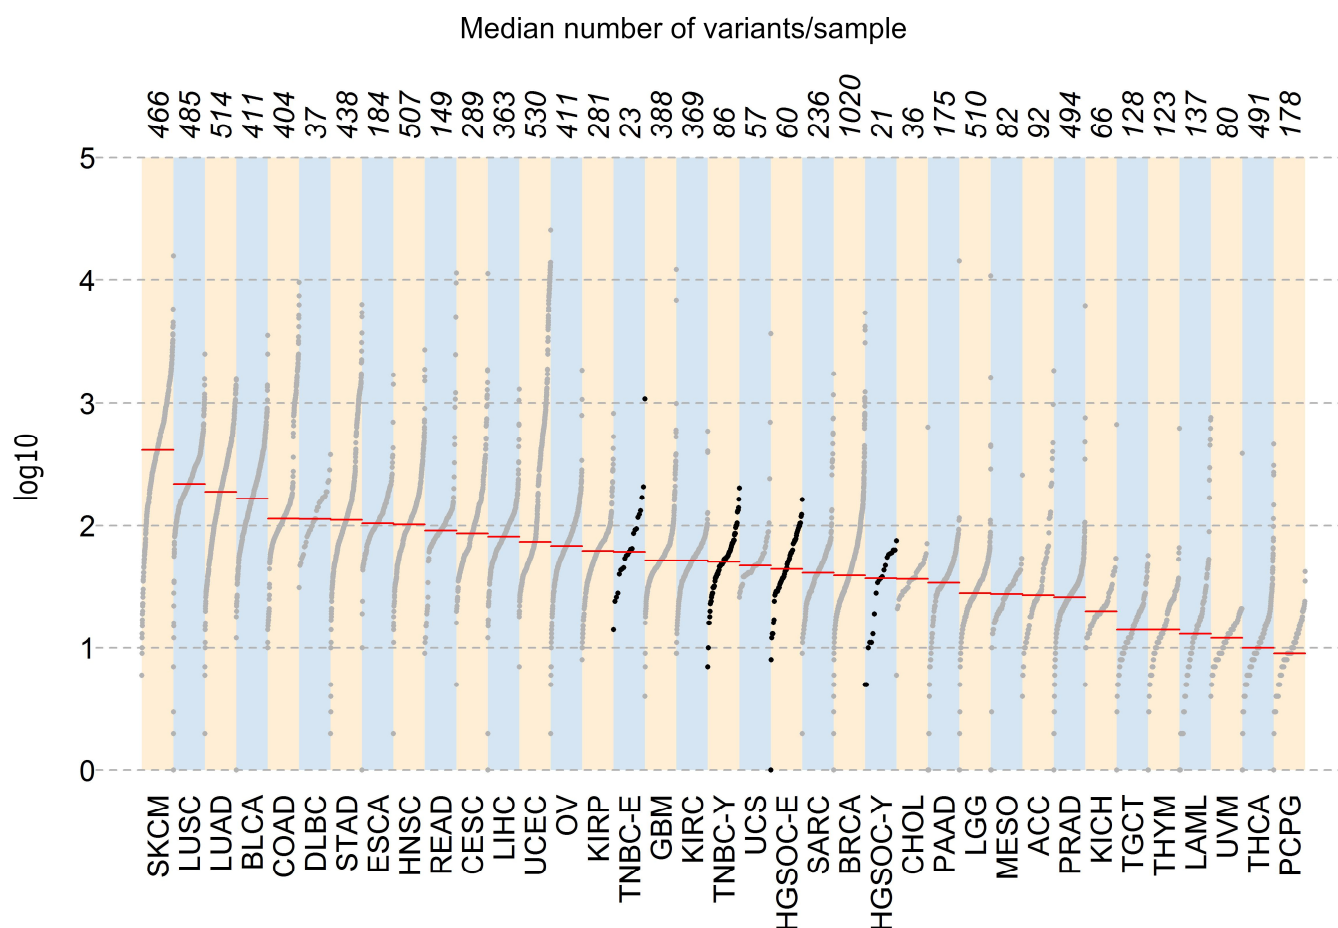

**Figure S2.** Number of non-synonymous coding variants per sample. The dot plot shows the distribution and median number (red line) of non-synonymous coding variants per sample in TCGA cohorts and those displayed in this work. Each point represents a patient (patients from our selected series are highlighted in bold). Y-axis: Number of non-synonymous coding variants ( $\log_{10}$ ); X-axis: bottom: cohorts names; top: number of patients. HGSOE-Y: Young HGSOE patients; HGSOE-E: Elderly HGSOE patients; TNBC-Y: Young TNBC patients; TNBC-E: HGSOE-Y vs TCGA OV:  $p=4.3 \times 10^{-6}$ ; HGSOE-E vs TCGA OV:  $p=1.8 \times 10^{-5}$ ; TNBC-Y vs TCGA BRCA:  $p=0.019$ ; TNBC-E vs TCGA BRCA:  $p=0.0091$ .

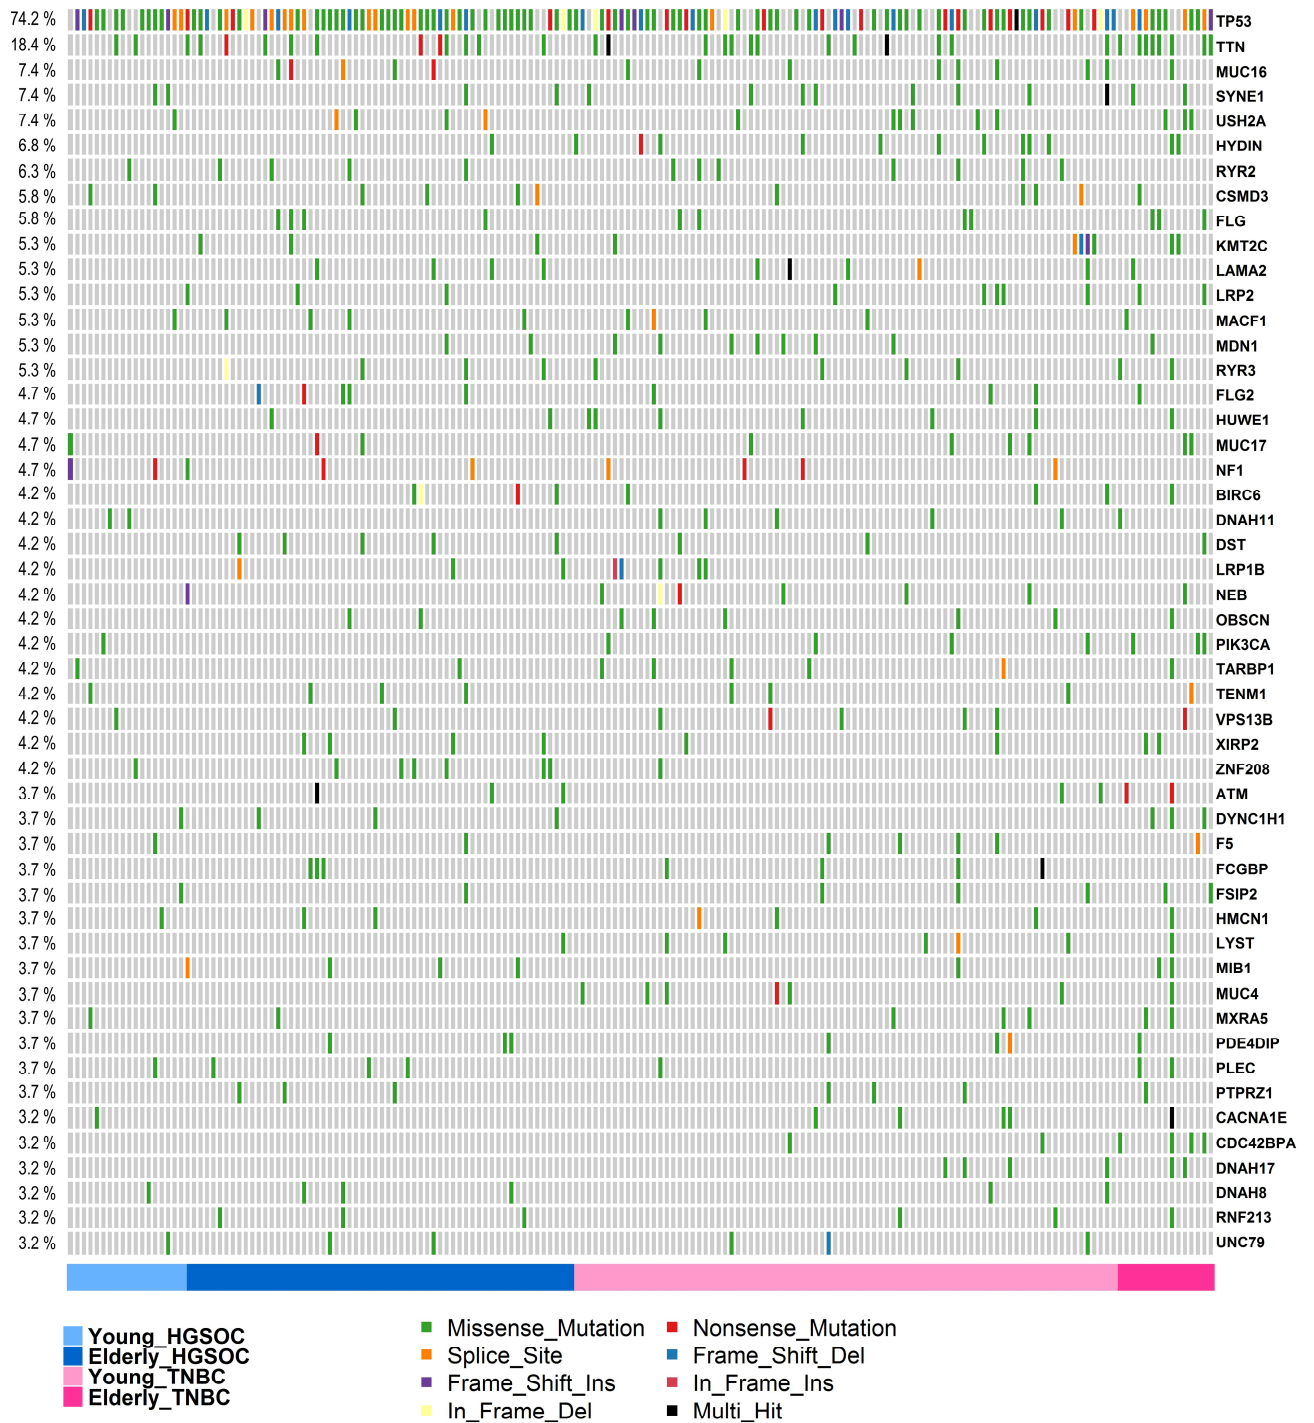

**Figure S3.** Overlapped frequently affected genes classified according to its variant type. Each column represents a patient and each line a gene (177 samples shown).

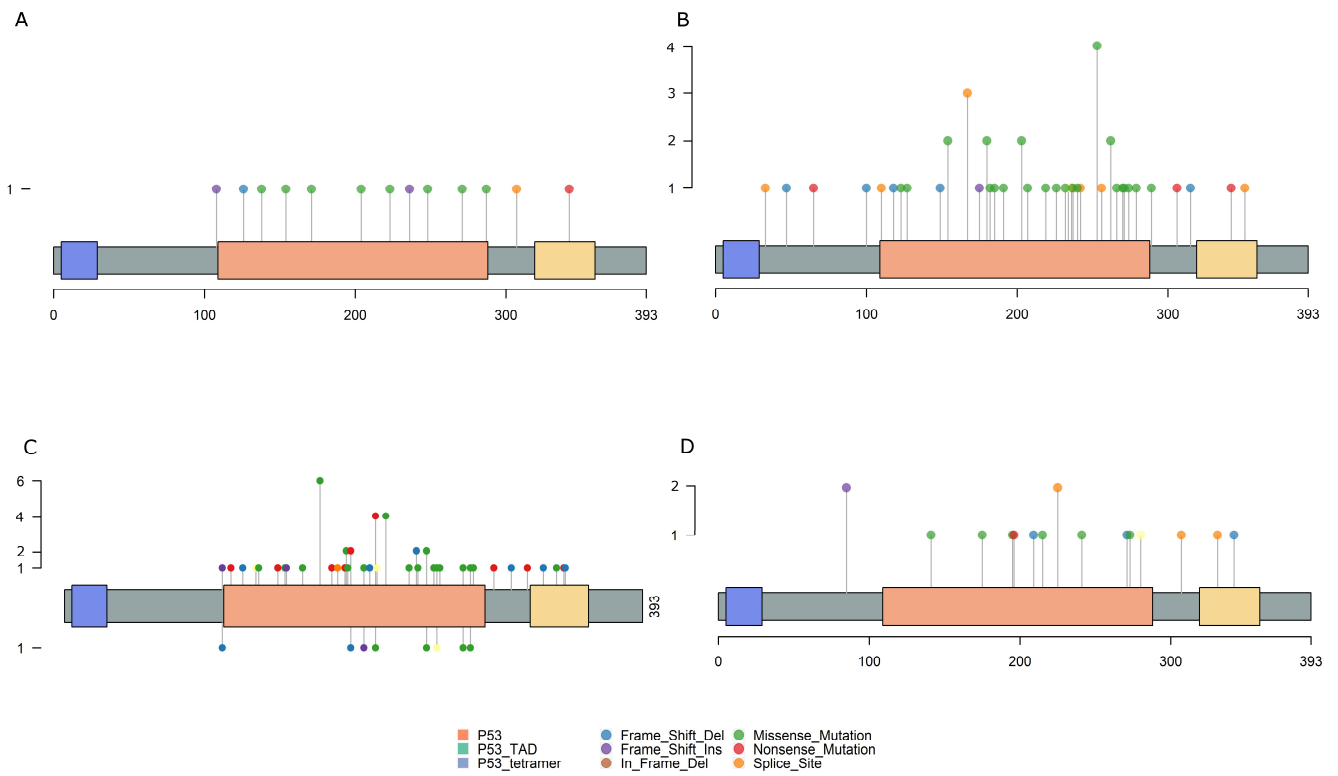

**Figure S4.** *TP53* variants. (A) Young HGSOc patients; (B) Elderly HGSOc patients; (C) Young TNBC patients; (D) Elderly TNBC patients. Y-axis: number of variants; X-axis: amino acid position and domains; P53: P53 DNA-binding domains; P53 Tetramer: P53 tetramerization motif; P53 TAD: P53 transactivation motif.
